# Supplementary material
Source: ML conference proceedings conference paper supplement (https://openreview.net/forum?id=x7S1NsUdKZ)
Supplement: supplementary_material [file attachment]

## 502 A Proof of Proposition 1

Our proof follows the standard proof of MAB lower bound. Let  $\Delta$  be some constant. Define some  $\theta_1 = (\underbrace{\Delta, \dots, \Delta}_{T \text{ times}}, \underbrace{0, \dots, 0}_{T(T-1) \text{ times}})^\top$ . For any algorithm running on this ASD, let  $T_1(n)$  be the total number of selections for the first  $T$  samples. If  $T_1(n) \leq T/2$ , the regret for  $\theta_1$  is greater than  $\Delta T/2$ . Let

$$k = \arg \min_{t > 1} \mathbb{E}_{\theta_1} T_t(n).$$

Since  $\sum_t \mathbb{E}_{\theta_1} T_t(n) = T$ , we have  $\mathbb{E}_{\theta_1} T_k(n) \leq T/(T-1) \leq 2$ . Without a loss of generality, we let  $k = 2$ . Define  $\tilde{\theta}_2 = (\underbrace{0, \dots, 0}_{T \text{ times}}, \underbrace{2\Delta, \dots, 2\Delta}_{T \text{ times}}, \underbrace{0, \dots, 0}_{T(T-2) \text{ times}})^\top$ . Then consider a uniform prior over  $\{\theta_1, \tilde{\theta}_2\}$ . The Bayesian regret is at least

$$\frac{T\Delta}{4} \mathbb{P}_{\theta_1}(T_1(n) \leq T/2) + \frac{T\Delta}{4} \mathbb{P}_{\tilde{\theta}_2}(T_1(n) > T/2)$$

503 where  $\mathbb{P}_\theta$  is the probability measure under the ASD problem with parameter  $\theta$ . Using Lemma 15.1  
504 [27], we have

$$\begin{aligned} \mathbb{P}_{\theta_1}(T_1(n) \leq T/2) + \mathbb{P}_{\tilde{\theta}_2}(T_1(n) > T/2) &\geq \exp(-D(\mathbb{P}_{\theta_1}, \mathbb{P}_{\tilde{\theta}_2}))/2 \\ &= \exp(-\mathbb{E}_{\theta_1}[T_2(n)] D(\mathcal{N}(0, 1), \mathcal{N}(2\Delta, 1)))/2 \\ &\geq \exp(-4\Delta^2)/2, \end{aligned}$$

505 where  $D(P_1, P_2)$  is the KL-divergence of two probability measure  $P_1$  and  $P_2$ . Now choosing  
506  $\Delta = 1/2$ , we have for any algorithm  $\mathcal{A}$ ,  $\mathcal{BR}(T, \mathcal{A}) \gtrsim T$ .

## 507 B Proof of Lemma 1

508 We decompose the Bayesian regret in terms of the instant regret

$$\begin{aligned} \mathcal{BR}(T; IDS) &= \mathbb{E}[\sum_{t=1}^T f_\theta(X_t^*) - \sum_{t=1}^T f_\theta(X_t)] \\ &= \mathbb{E}[\sum_{t=1}^T \langle \pi_t, \Delta_t \rangle] \\ &\leq \mathbb{E}[\sum_{t=1}^T (\Psi_{*,\lambda} g_t^\top \pi_t)^{1/\lambda}] \\ &= \Psi_{*,\lambda}^{1/\lambda} \mathbb{E}[\sum_{t=1}^T (g_t^\top \pi_t)^{1/\lambda}] \\ &\leq \Psi_{*,\lambda}^{1/\lambda} T^{1-1/\lambda} \mathbb{E}[\sum_{t=1}^T (g_t^\top \pi_t)^{1/\lambda}] \\ &\leq \Psi_{*,\lambda}^{1/\lambda} T^{1-1/\lambda} \mathbb{E}[\sum_{t=1}^T I_t(X_{t,1}^*, \dots, X_{t,T-t+1}^*; (X_t, Y_t))]^{1/\lambda} \\ &\quad \text{(using the fact that } \{X_{t,1}^*, \dots, X_{t,T-t+1}^*\} \subset \{X_1^*, \dots, X_T^*\}) \\ &\leq \Psi_{*,\lambda}^{1/\lambda} T^{1-1/\lambda} \mathbb{E}[\sum_{t=1}^T I_t(X_1^*, \dots, X_T^*; (X_t, Y_t))]^{1/\lambda} \\ &\leq \Psi_{*,\lambda}^{1/\lambda} T^{1-1/\lambda} H(X_1^*, \dots, X_T^*)^{1/\lambda} \end{aligned}$$

## 509 C Generalized Linear Model

510 We start from proving for the simple linear regression i.e.  $\mu(x) = x$ .

511 *Proof.* Let  $\pi_t^{ts}$  be the Thompson sample policy at the step  $t$ , i.e.  $\pi_t^{ts}(x) = \mathbb{P}_t(X_{t,1}^* = x)$ . We have

$$\Psi_t = \frac{(\Delta_t^\top \pi_t)^2}{g_t^\top \pi_t} \leq \frac{(\Delta_t^\top \pi_t^{ts})^2}{g_t^\top \pi_t^{ts}}.$$

512 We first write the instant regret in the following form:

$$\begin{aligned} \Delta_t^\top \pi_t^{ts} &= \mathbb{E}_t[\theta^\top X_{t,1}^*] - \sum_{x \in S_t^n} \pi_t^{ts}(x) \mathbb{E}_t[\theta^\top x] \\ &\leq \sum_{x \in S_t^n} \mathbb{P}_t(X_{t,1}^* = x) (\mathbb{E}_t[\theta^\top x \mid X_{t,1}^* = x] - \mathbb{E}_t[\theta^\top x]). \end{aligned}$$

513 Now we deal with the information gain term. Let  $Y_{t,x}$  be the observation at step  $t$  when selecting  
514 input  $x$  and  $\epsilon_{t,x}$  be the noise generated. We have  $Y_{t,x} = \mu(\theta^\top x) + \epsilon_{t,x}$ . The mutual information can  
515 be represented by the Kullback-Leibler divergence between the joint distribution of the two variables  
516 and the product of their marginal distribution, i.e.

$$I_t(X_{t,1}^*; Y_{t,x}) = \sum_{x' \in S_t^n} D(\mathbb{P}_t(Y_{t,x} \mid X_{t,1}^* = x') \parallel \mathbb{P}_t(Y_{t,x})). \quad (3)$$

**Lemma 2** (Fact 9 [34]). *For any distribution  $P$  and  $Q$  such that  $P$  is absolutely continuous with respect to  $Q$ , any random variable  $X : \Omega \mapsto \mathcal{X}$  and any  $g : \mathcal{X} \mapsto \mathbb{R}$  such that  $\sup g - \inf g \leq 1$ ,*

$$\mathbb{E}_P[g(X)] - \mathbb{E}_Q[g(X)] \leq \sqrt{\frac{1}{2} D(P \parallel Q)},$$

517 where  $\mathbb{E}_P$  and  $\mathbb{E}_Q$  denote the expectation operators under  $P$  and  $Q$ .

518 By Lemma 2 with  $g(x) = x$  and  $X = Y_{t,x}$ , the information gain can be lower bounded by:

$$g_t^\top \pi_t^{ts} \geq 2 \sum_{x, x' \in S_t^n} \mathbb{P}_t(X_{t,1}^* = x) \mathbb{P}_t(X_{t,1}^* = x') (\mathbb{E}_t[Y_{t,x} \mid X_{t,1}^* = x'] - \mathbb{E}_t[Y_{t,x}])^2$$

Let

$$M_{x,x'} = \sqrt{P(X_{t,1}^* = x) P(X_{t,1}^* = x')} (\mathbb{E}[Y_{t,x} \mid X_{t,1}^* = x] - \mathbb{E}[Y_{t,x}]).$$

519 Then  $\Delta_t^\top \pi_t^{ts} = \text{trace}(M)$  and  $v_t^\top \pi_t^{ts} = \|M\|_F^2$ .

By Fact 2 of [35], we have

$$\Delta_t^\top \pi_t^{ts} / v_t^\top \pi_t^{ts} = \text{trace}(M) / (2\|M\|_F^2) \leq \text{rank}(M) \leq d/2.$$

520

□

## 521 C.1 Proof of Theorem 1

522 *Proof.* Using the similar strategy for linear model, we let  $\pi_t^{ts}$  be the Thompson sample policy at the  
523 step  $t$ .

524 Using the fact that  $\mu$  is  $L_\mu$ -Lipschitz

$$\begin{aligned} \Delta_t^\top \pi_t^{ts} &= \mathbb{E}_t[\mu(\theta^\top X_{t,1}^*)] - \sum_{x \in S_t^n} \pi_t^{ts}(x) \mathbb{E}_t[\mu(\theta^\top x)] \\ &= \sum_{x \in S_t^n} \mathbb{P}_t(X_{t,1}^* = x) (\mathbb{E}_t[\mu(\theta^\top X_{t,1}^*)] - \mathbb{E}_t[\mu(\theta^\top x)]) \\ &\leq L_\mu \sum_{x \in S_t^n} \mathbb{P}_t(X_{t,1}^* = x) (\mathbb{E}_t[(\theta^\top X_{t,1}^*)] - \mathbb{E}_t[(\theta^\top x)]) \\ &\leq L_\mu \sum_{x \in S_t^n} \mathbb{P}_t(X_{t,1}^* = x) (\mathbb{E}_t[(\theta^\top x) \mid X_{t,1}^* = x] - \mathbb{E}_t[(\theta^\top x)]). \end{aligned}$$

525 The major difference is on the lower bound of the information gain term. We follow a similar  
 526 strategy in [10]. Let  $f(x) = \mathbb{E}[\mu^{-1}(x - \tilde{\epsilon})]$ , where  $\tilde{\epsilon}$  follows exactly the same distribution of  $\epsilon$ . Let  
 527  $\tilde{Y}_{t,x} = f(Y_{t,x}) = \mathbb{E}[\mu^{-1}(Y_{t,x} - \tilde{\epsilon}) \mid Y_{t,x}]$ . Then we have

$$\begin{aligned}\mathbb{E}[\tilde{Y}_{t,x} \mid \theta] &= \mathbb{E}[\mathbb{E}[\mu^{-1}(Y_{t,x} - \tilde{\epsilon}) \mid Y_{t,x}] \mid \theta] \\ &= \mathbb{E}[\mathbb{E}[\mu^{-1}(Y_{t,x} - \epsilon) \mid Y_{t,x}] \mid \theta] \\ &= \mathbb{E}[\mathbb{E}[\mu^{-1}(\theta^\top x) \mid Y_{t,x}] \mid \theta] \\ &= \theta^\top x.\end{aligned}$$

528 Since  $\tilde{Y}_{t,x}$  is a linear regression outcome, the information gain

$$\begin{aligned}I(X_1^*; \tilde{Y}_{t,x}) &\geq 2 \sum_{x' \in S_t^n} \mathbb{P}_t(X_{t,1}^* = x') (\mathbb{E}_t[\tilde{Y}_{t,x} \mid X_{t,1}^* = x'] - \mathbb{E}_t[\tilde{Y}_{t,x}])^2 \\ &= 2 \sum_{x' \in S_t^n} \mathbb{P}_t(X_{t,1}^* = x') (\mathbb{E}_t[\theta^\top x \mid X_{t,1}^* = x'] - \mathbb{E}_t[\theta^\top x])^2.\end{aligned}$$

To proceed, we notice that  $\tilde{Y}_{t,x}$  is a deterministic function of  $Y_{t,x}$ . Hence,  $I(X_1^*; \tilde{Y}_{t,x}) \leq I(X_1^*; Y_{t,x})$ . Then we have

$$g_t^\top \pi_t^{ts} \geq 2 \sum_{x, x' \in S_t^n} \mathbb{P}_t(X_{t,1}^* = x) \mathbb{P}_t(X_{t,1}^* = x') (\mathbb{E}_t[\theta^\top x \mid X_{t,1}^* = x'] - \mathbb{E}_t[\theta^\top x])^2$$

529 From here the same analysis for linear model can be applied. □

## 530 D Low-rank Matrix

531 We denote a policy at time  $t$  by  $\pi_t \in [0, 1]^{|\Omega_t^c|}$  each dimension corresponding to a unlabeled entry.  
 532 Now we derive the instant regret and information gain. We denote an index by  $a = (a_1, a_2)$ , where  
 533  $a_1, a_2$  are row and column indices.

534 Let  $\mu$  be uniform distribution over  $\Omega_t^c$ . Using Lemma 3 [34], we have

$$\begin{aligned}\langle \pi_t, I_t \rangle &\geq \frac{2}{B^2 + 1} \sum_{a \in \Omega_t^c} \mu(a) \sum_{a^* \in \Omega_t^c} \mathbb{P}_t(X_{t,1}^* = a^*) (\mathbb{E}_t[Y_{t,a} \mid X_{t,1}^* = a^*] - \mathbb{E}_t[Y_{t,a}])^2 \\ &= \frac{2}{B^2 + 1} \sum_{a^* \in \Omega_t^c} \mathbb{P}_t(X_{t,1}^* = a^*) \sum_{a \in \Omega_t^c} \mu(a) (\mathbb{E}_t[M_a \mid X_{t,1}^* = a^*] - \mathbb{E}_t[M_a])^2 \\ &= \frac{2}{B^2 + 1} \sum_{a^* \in \Omega_t^c} \mathbb{P}_t(X_{t,1}^* = a^*) \sum_{a \in \Omega_t^c} \mu(a) (\mathbb{E}_t[M_a \mid X_{t,1}^* = a^*] - \mathbb{E}_t[M_a])^2 \\ &= \frac{2}{B^2 + 1} \sum_{a^* \in \Omega_t^c} \mathbb{P}_t(X_{t,1}^* = a^*) \frac{1}{|\Omega_t^c|} \|M^{t,a^*}\|_F^2 \\ &\geq \frac{2}{B^2 + 1} \sum_{a^* \in \Omega_t^c} \mathbb{P}_t(X_{t,1}^* = a^*) \frac{1}{m^2} \|M^{t,a^*}\|_F^2 \\ &\geq \frac{2}{B^2 + 1} \sum_{a^* \in \Omega_t^c} \mathbb{P}_t(X_{t,1}^* = a^*) \frac{1}{Rm^2} \text{trace}^2(M^{t,a^*}).\end{aligned}$$

535 where  $M^{t,a^*} := \mathbb{E}_t[M \mid X_{t,1}^* = a^*] - \mathbb{E}_t[M]$ .

536 To upper bound the instant regret, let  $\pi_t^{ts}$  be the Thompson Sampling policy. We have

$$\begin{aligned}
\langle \pi_t, \Delta_t \rangle &= \sum_a \mathbb{P}_t(X_{t,1}^* = a) (\mathbb{E}_t[M_{X_1^*}] - \mathbb{E}_t[M_a]) \\
&= \sum_a \mathbb{P}_t(X_{t,1}^* = a) (\mathbb{E}_t[M_a | X_{t,1}^* = a] - \mathbb{E}_t[M_a]) \\
&\leq \sqrt{\sum_a \mathbb{P}_t(X_{t,1}^* = a) (\mathbb{E}_t[M_a | X_1^* = a] - \mathbb{E}_t[M_a])^2} \\
&\leq \sqrt{\sum_a \mathbb{P}_t(X_{t,1}^* = a) \max_{a'} (M_{a'}^{t,a})^2} \\
&\quad \text{(Using Assumption 2)} \\
&\leq \sqrt{\sum_a \mathbb{P}_t(X_{t,1}^* = a) (4 \frac{\gamma^r}{m})^2 \text{trace}^2(M^{t,a})}.
\end{aligned}$$

537 Now we consider a mixed policy:  $\pi_t = p\mu + (1-p)\pi_t^{PS}$  for some  $p \in [0, 1]$ .

$$\langle \pi_t, I_t \rangle \geq p \langle \mu, I_t \rangle \geq \frac{2p}{B^2 + 1} \sum_{a^* \in \Omega_i^*} \mathbb{P}_t(X_{t,1}^* = a^*) \frac{1}{Rm^2} \text{trace}^2(M^{t,a}).$$

$$\begin{aligned}
\langle \pi_t, \Delta_t \rangle &\leq pB + (1-p) \langle \pi_t^{PS}, \Delta_t \rangle \\
&\leq pB + (1-p) \sqrt{\sum_a \mathbb{P}_t(X_{t,1}^* = a) (4 \frac{\gamma^r}{m})^2 \text{trace}^2(M^{t,a})}
\end{aligned}$$

By optimizing  $p$ , we have

$$\frac{\langle \pi_t, \Delta_t \rangle^3}{\langle \pi_t, I_t \rangle} \leq 4B(B^2 + 1)r^3\gamma^2.$$

Combined with Lemma 1, we have the following Bayesian regret bound

$$\mathcal{BR}(T, \text{IDS}) \lesssim (4B(B^2 + 1)r^3\gamma^2 H(M)T^2)^{1/3}.$$

## 538 E Graph

539 *Proof.* The  $\sqrt{T}$  term in the maximization can be achieved by replacing  $\pi_{IS}$  with  $\pi_{TS}$  and use the  
540 fact that each complete subgraph can be treated as a single node.

541 Let  $C_t$  be the smallest maximum independent set at the step  $t$ . To prove the  $T^{2/3}$  term, we consider a  
542 mixture policy  $\pi_t^{mix} = \gamma\pi_t^C + (1-\gamma)\pi_t^{TS}$  for some  $\gamma > 0$ , where  $\pi_t^C$  is the uniform distribution  
543 over  $C_t$ .

We have

$$\Delta_t(\pi_t^{mix}) \leq \gamma B + (1-\gamma)\Delta_t(\pi_t^{TS}).$$

For information gain, we have

$$g_t(\pi_t^{mix}) \geq \gamma g_t(\pi_t^C).$$

544 Since each node in  $S_t^n$  has an edge to at least one node in the maximum independent set (otherwise  
545 they have to be added to the set), we have

$$g_t(\pi_t^C) \geq \frac{1}{|C_t|} \sum_{x \in C_t} I_t(X_{t,1}^*; O_t(x)) \geq \frac{1}{|C_t|} \sum_{x \in S_t^n} I_t(X_{t,1}^*; Y_{t,x}).$$

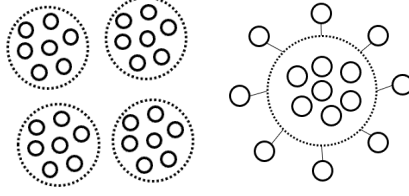

Figure 2: An illustration of graphs with rich structural information. Each dashed circle represent a complete subgraph. The graph on the left hand side has  $\mathcal{X}(G) = 4$ , while  $N = 28$ . The graph on the right hand side is a illustration of the star graph, in which each node outside the dashed circle has an edge to every node inside of the circle. This graph has  $\mathcal{C}(G) = 1$ , while  $\mathcal{X}(G) = 8$  and  $N = 15$ .

Using (3) and Lemma 2 again, we have

$$\sum_{x \in S_t^n} I_t(X_{t,1}^*; Y_{t,x}) \geq \sum_{x \in S_t^n} \mathbb{P}_t(X_{t,1}^* = x) (\mathbb{E}_t[Y_{t,x} | X_{t,1}^* = x'] - \mathbb{E}_t[Y_{t,x}])^2.$$

We also have

$$(\Delta_t^\top \pi_t^{TS})^2 \leq \left( \sum_{x \in S_t^n} \mathbb{P}_t(X_{t,1}^* = x) (E_t[Y_{t,x} | X_{t,1}^* = x'] - \mathbb{E}_t[Y_{t,x}]) \right)^2.$$

Therefore, we have

$$g_t(\pi_C^t) \geq \frac{1}{|C_t|} (\Delta_t(\pi_t^{TS}))^2 \geq \frac{1}{C_T(G)} (\Delta_t(\pi_t^{TS}))^2.$$

Henceforth,

$$\begin{aligned} \Delta_t(\pi_t^{mix})^3 / g(\pi_t^{mix}) &\leq \frac{(\gamma B + (1 - \gamma)(C_T(G)^{1/2} g_t^{1/2}) / \gamma^{1/2})^3}{g_t} \\ &\leq \frac{(\gamma B + (C_T(G)^{1/2} g_t^{1/2}) / \gamma^{1/2})^3}{g_t}. \end{aligned}$$

By optimizing  $\gamma$ , we have

$$\Delta_t(\pi_t^{mix})^3 / g(\pi_t^{mix}) \leq BC(G).$$

547

□

## 548 **F Generic results**

549 The proof is analogous to the above proof for matrix and graph models. Consider a mixed policy  
550  $\tilde{\pi}_t = p\mu + (1 - p)\pi_t^{ts}$ .

We have

$$g_t^\top \tilde{\pi}_t \geq p g_t^\top \mu \geq p \phi(\Delta_t^\top \pi_t^{ts})^2$$

and

$$\Delta_t^\top \tilde{\pi}_t \leq (1 - p) \Delta_t^T \pi_t^{ts} + pB$$

Thus

$$\frac{(\Delta_t^\top \tilde{\pi}_t)^3}{g_t^\top \tilde{\pi}_t} \leq \frac{((1 - p) \Delta_t^T \pi_t^{ts} + pB)^3}{p \phi(\Delta_t^\top \pi_t^{ts})^2} \leq \frac{(\Delta_t^T \pi_t^{ts} + pB)^3}{p \phi(\Delta_t^\top \pi_t^{ts})^2}.$$

551 The proof is finished by optimizing  $p$ .

## 552 G Sparse linear model

Consider a linear regression problem

$$Y = X^\top \theta + \epsilon,$$

553 where  $\theta \in \mathbb{R}^d$  and  $\|\theta\|_0 = s$  is the sparsity and  $\epsilon$  is the zero-mean noise. In general, we expect  
 554  $d \gg T$ , in which case, any dependence on  $d$  would lead to a linear regret.

555 Similarly to [14], we need to assume an exploratory unlabeled set.

556 **Assumption 4.** Let  $C_{\min}(S^n) = \max_{\mu \in \mathcal{D}(S^n)} \sigma_{\min}(\mathbb{E}_{x \sim \mu}[xx^\top])$ . If  $C_{\min}(S_T^n) \geq 1$  almost surely  
 557 for any algorithm, then we say that  $S^n$  is exploratory.

**Theorem 4** (Theorem 5.3 in [14]). The following regret holds for IDS with  $\lambda = 3$ , if  $S^n$  is exploratory

$$\mathcal{BR}(T, \text{IDS}) \lesssim (s^2 T^2 \Delta)^{1/3},$$

where

$$\Delta = \min \left( \log(n), 2s \log \left( C d T^{1/2} / s \right) \right)$$

558 for some constant  $C > 0$ .

559 The proof in [14] on sparse linear bandit is also applicable here. The only difference is that we make  
 560 a stronger assumption on the exploratory set stating that the unlabeled dataset is still exploratory  
 561 after eliminating any  $T$  elements. This is to guarantee the exploratory set for any step during the  
 562 decision-making process.

## 563 H Experiments

### 564 H.1 Approximate algorithm

565 The approximate algorithm, SampleVIDS is given in Algorithm 2.

---

#### Algorithm 2 SampleVIDS (Sample Variance-based IDS)

---

**Input:** Unlabeled dataset  $S_t^n$ , prior distribution  $\phi$ , total number of steps  $T$ , number of posterior samples  $M$ , constant  $\lambda$ .

Initialize history  $\mathcal{F}_0 = \{\}$ .

**for**  $t = 1$  **to**  $T$  **do**

    Sample  $\theta_1, \dots, \theta_M$  from  $\phi(\cdot \mid \mathcal{F}_{t-1})$ .

    Calculate instant regret by  $\Delta_t(x) = \sum_{i=1}^M \max_{x' \in S_t^n} f_{\theta_i}(x') - f_{\theta_i}(x)$  for all  $x \in S_t^n$ .

    Let  $\Theta(x) = \{\theta_i : x \in \arg \max_{x' \in S_t^n} f_{\theta_i}(x')\}$  and  $\bar{f}(x) = \sum_{i=1}^M f_{\theta_i}(x) / M$ .

    Calculate variance-based information ratio for all  $x \in S_t^n$  by

$$v_t(x) = \sum_{x' \in S_t^n} \frac{|\Theta(x')|}{M} \left( \frac{1}{|\Theta(x')|} \sum_{\theta \in \Theta(x')} f_{\theta}(x) - \bar{f}(x) \right)^2.$$

    Calculate the information ratio  $\Psi_t(x) = \Delta_t(x)^\lambda / v_t(x)$  and label  $X_t = \arg \max_x \Psi_t(x)$ .

    Update history  $\mathcal{F}_t = \mathcal{F}_{t-1} \cup \{(X_t, Y_t)\}$ .

**end for**

---

### 566 H.2 Complete graph for simulation studies

567 We provide the complete simulation results in Figure 3.

### 568 H.3 Additional information for reaction condition discovery

569 **Additional information on two datasets.** The complete library of informer molecules for Pho-  
 570 toredox Nickel Dual-Catalysis (PNDC) and the structure of reactions for C-N Cross-Coupling with  
 571 Isoxazoles (CNCCI) are provided in Figure 4 and 5. For PNDC, note that we only report the results

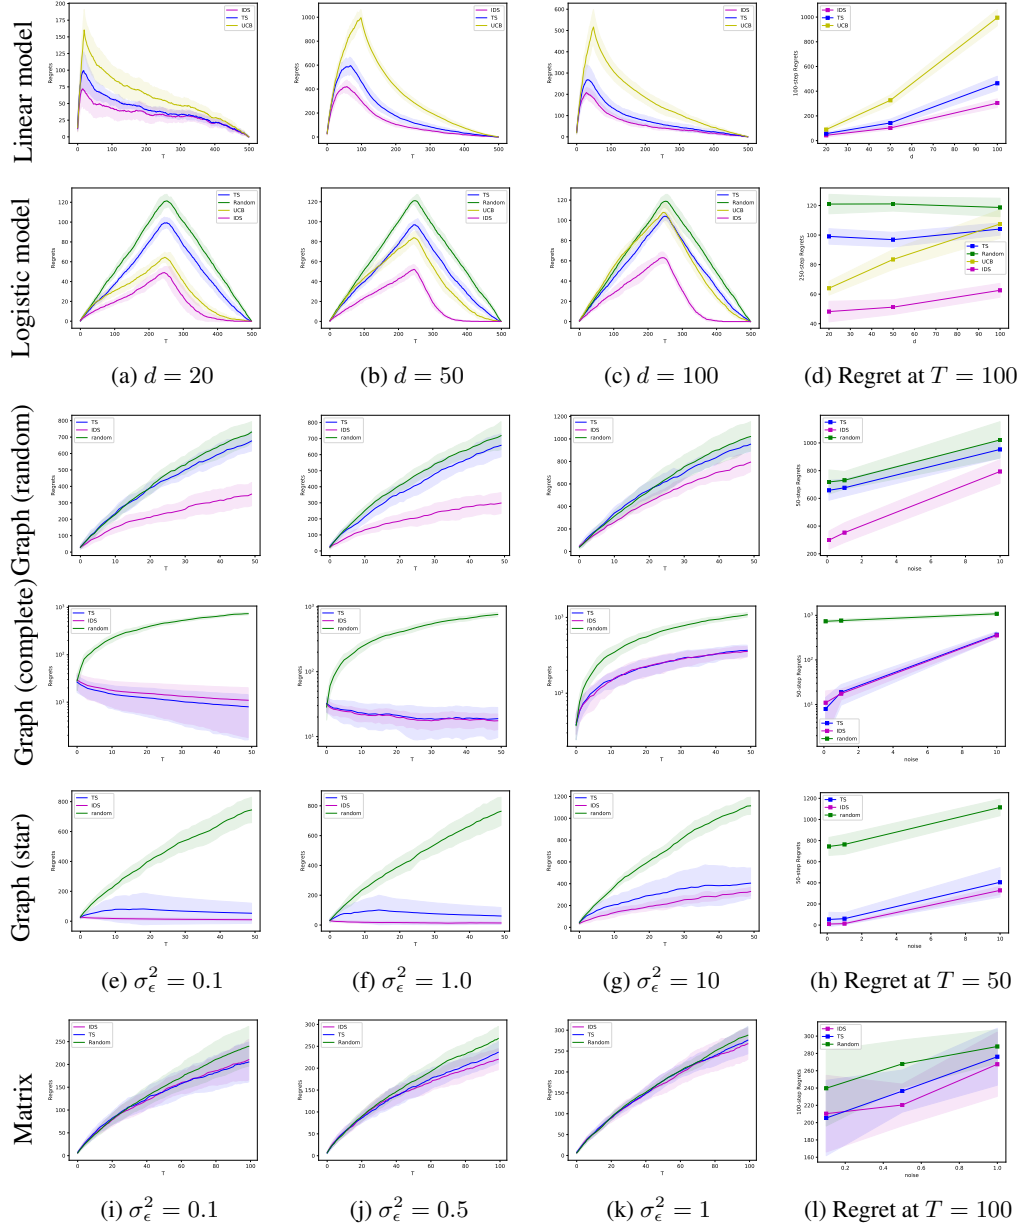

Figure 3: Cumulative regret curves for linear regression (row 1), logistic regression (row 2), random graph, star graph (row 3, 4) and low-rank matrix (row 5). The left three columns are the regret curves for different dimensions  $d = 20, 50, 100$  in linear and logistic regression simulations and for different noise levels in graph and low-rank matrix simulations. The last column is the early-stage cumulative regret. The confidence ranges are given by the standard deviation of 10 independent runs.

for X2, X3, X4, X5, X6, X8, X11, X12, X13, X14, X15 in PNDC due to very low yields across all reaction conditions for the remaining molecules. Additionally, while the original dataset considers 12 photocatalysts (total 96 reaction conditions) for each molecule, we consider 10 photocatalysts (80 reaction conditions), due to the unavailability of descriptors that we intended to use. For CNCCI, only pairs of catalyst and base with datapoints of all 330 combinations of 15 aryl halides and 22 isoxazoles were considered. The features used for CNCCI is a subset of those prepared in [2], with highest feature importance values in models presented in the original work.

The two datasets are included in **PNDC.xlsx** and **CNCCI.xlsx** under data folder in the code. Each file has two sheets for yield and descriptors respectively.

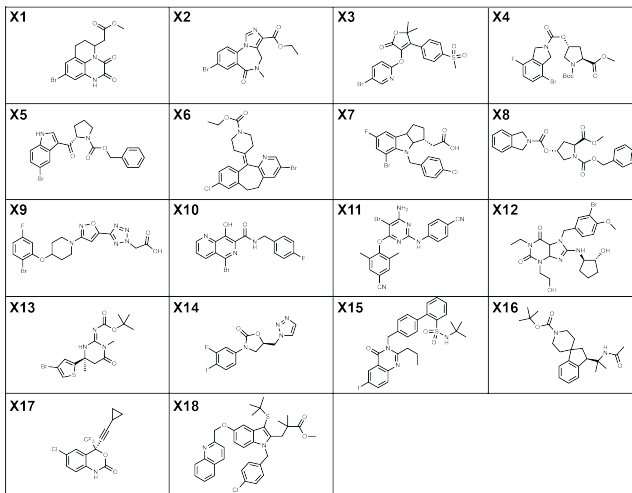

Figure 4: Complete library for PNDC (Figure 2 in [11]).

**Response distribution.** Figure 6 provides the distributions of the response variables in two dataset.

**Complete regret curves for PNDC.** The complete regret curves for PNDC is given in Figure 7.

**Complete regret curves for CNCCI.** The complete regret curves for CNCCI is given in Figure 8.

## I Comparison to ENS

In this section, we briefly compare IDS with ENS (efficient nonmyopic search).

We observed that ENS tends to over explore in the experiments on linear models. See our new Figure 9 in the appendix. We believe this is because ENS assumes that the labels of all remaining unlabeled points are conditionally independent. That is the extra gain by observing the new label  $y_t$  is uniform across all the remaining  $T - t$  points. This is over estimating the gain, because in the later stage when the estimates on  $\Pr(y = 1 | x, \mathcal{F}_t)$  are more accurate the extra gain from observing a single label is also much less. ENS thus weighs too much on the exploration side. We highly believe that this will lead to linear regret instead of  $T$  regret that can be achieved by IDS. This is also reflected in Figure 9, where ENS performs worse than IDS when noise level of the problem is low and we need more exploitation. In general, IDS provides a more flexible balance between exploration and exploitation.

We compare IDS with ENS on linear models with different level of noise. In general, a more noisy model requires more exploration. In Figure 9, ENS performs worse in the low-noise models while outperform IDS in higher noise settings.

### I.1 Computation resources and implementation assets.

All the computation are done on MacBook Pro with 1.4 GHz Quad-Core Intel Core i5 Processor and 16GB Memory. Part of the code is from [39].



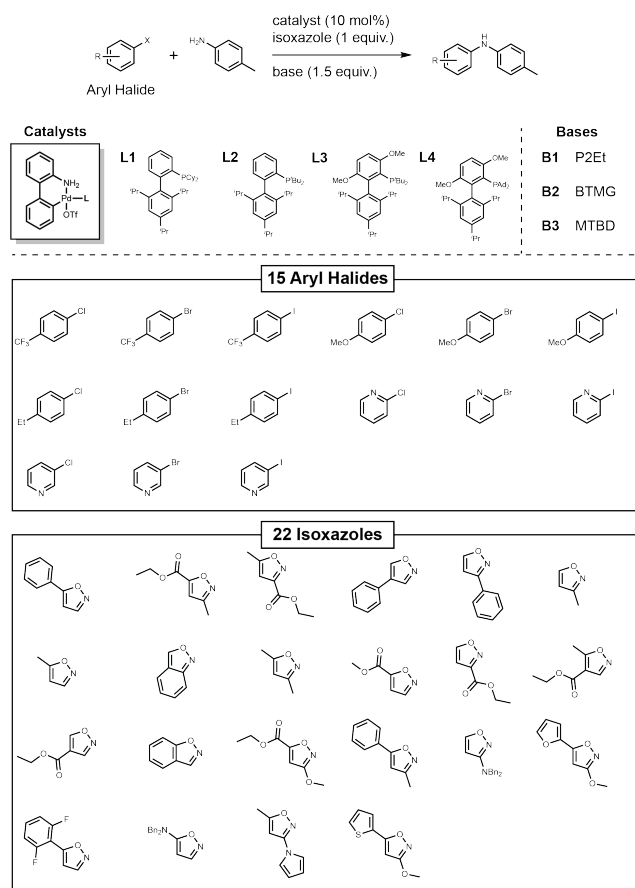

Figure 5: Complete library for CNCCI (Figure 3 in [2]).

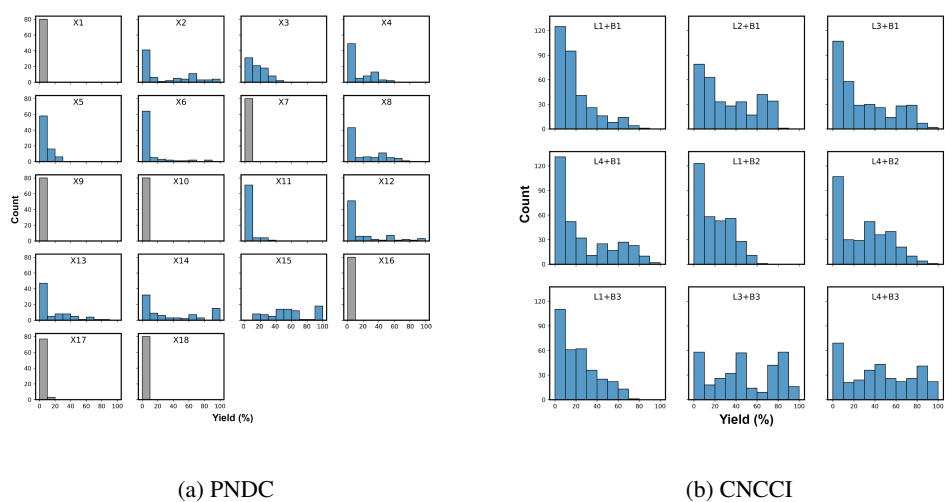

Figure 6: The distribution of the response variables in PNDC and CNCCI dataset. x-axes are response variables (yield rate) and each panel corresponds to one target molecule.

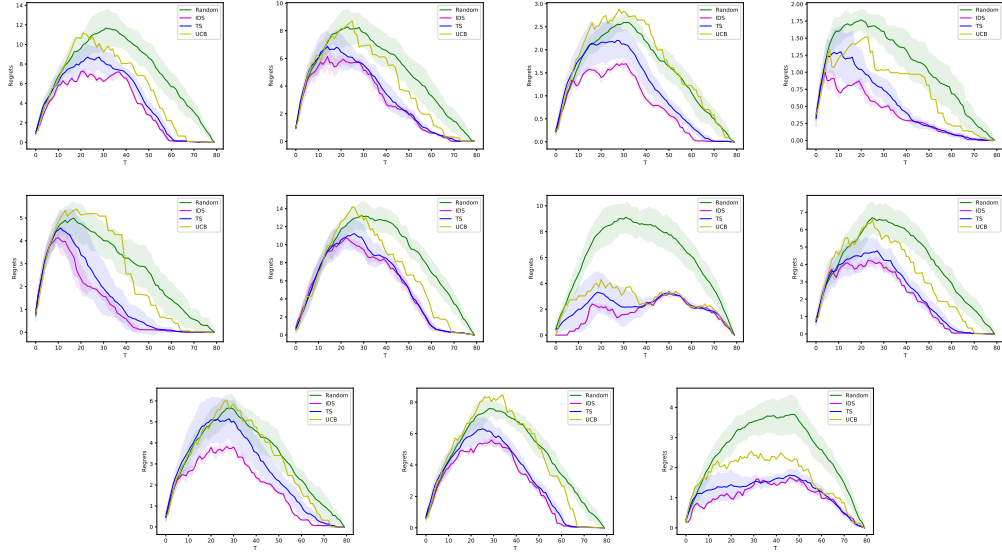

Figure 7: The whole horizon regret curves for PNDC dataset that corresponds to Table 1. The confidence interval are the standard deviation calculated from 10 independent runs.

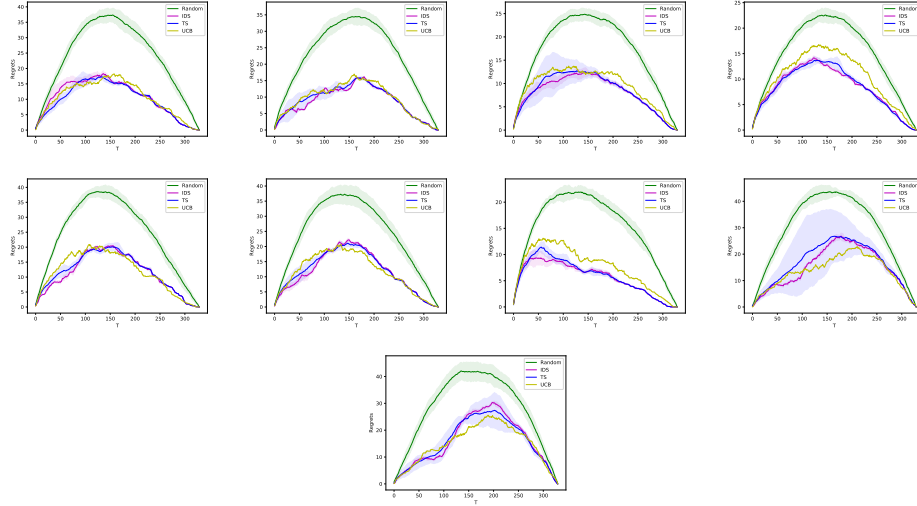

Figure 8: The whole horizon regret curves for CNCCI dataset that corresponds to Table 1. The confidence interval are the standard deviation calculated from 10 independent runs.

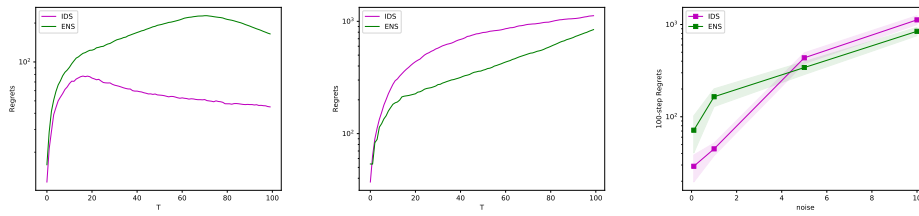

Figure 9: Comparing IDS with ENS on linear models with  $\sigma = 0.1, 1, 5, 10$ .
