# Supplementary material
Source: ML conference proceedings conference paper supplement (https://openreview.net/forum?id=x7S1NsUdKZ)
Supplement: supplementary_material [file PNDC.xlsx]

## Sheet: yield
X2	X3	X4	X5	X6	X8	X11	X12	X13	X14	X15
61	31	26	8	0	61	1	24	24	66	57
55	19	31	9	2	62	1	49	30	68	47
60	2	34	6	30	52	0	52	29	68	29
37	0	4	0	15	22	5	2	4	26	16
60	30	24	16	2	30	1	16	36	90	80
68	16	31	19	7	41	0	72	57	100	100
70	1	36	15	60	26	0	72	45	76	29
42	0	2	1	28	7	0	3	0	23	22
43	29	10	8	0	42	1	15	19	77	58
54	29	19	11	0	44	2	27	26	73	41
63	12	33	12	6	51	7	62	46	65	57
46	3	23	0	25	46	2	15	7	44	24
66	39	17	13	0	16	0	6	32	100	100
85	33	31	16	1	46	1	11	45	100	100
91	5	52	22	17	35	0	100	70	93	54
76	2	22	10	64	54	0	30	29	65	36
38	32	2	5	0	24	2	9	14	41	60
42	26	6	9	0	35	3	16	18	22	59
12	4	32	15	11	42	27	51	47	0	34
5	1	33	10	16	40	24	25	31	3	13
66	43	6	5	0	14	0	4	21	60	100
64	33	13	11	0	24	1	5	32	52	94
28	2	48	27	16	58	5	83	85	0	44
15	0	46	24	41	27	4	57	68	4	22
4	28	0	0	0	9	1	2	2	9	63
13	25	0	1	0	9	1	4	3	17	53
47	4	11	9	0	22	12	3	12	69	53
52	2	30	9	0	43	38	27	30	97	37
8	40	0	1	0	11	1	0	4	17	100
18	31	2	2	0	5	2	2	5	30	10
69	3	23	10	0	13	6	51	22	99	63
81	0	49	25	59	63	17	54	61	100	49
58	15	21	12	1	40	1	17	29	94	55
70	5	29	13	3	42	2	57	38	96	67
66	1	39	5	27	41	20	99	33	93	54
64	0	33	1	37	33	20	20	8	59	42
85	14	38	19	3	35	0	27	45	100	100
92	4	39	23	8	54	1	53	66	100	100
100	0	55	23	89	75	11	100	63	100	66
99	0	26	11	83	60	12	30	28	96	62
0	14	0	0	0	0	0	0	0	3	53
0	16	0	0	0	0	0	0	0	4	67
0	17	1	0	0	0	3	2	0	3	40
6	22	0	0	0	2	3	5	2	7	40
0	23	0	0	0	0	0	0	1	5	100
0	23	0	0	0	0	0	0	0	5	100
0	23	0	1	0	0	0	2	0	0	54
0	23	0	1	0	0	3	5	0	10	52
0	15	0	0	0	0	0	0	2	5	65
2	16	0	1	0	2	0	0	3	6	63
9	20	0	2	0	3	0	2	8	16	43
5	4	0	9	0	0	0	0	2	11	33
1	26	0	0	0	2	0	0	3	6	100
2	24	0	1	0	2	0	0	5	7	100
14	31	0	3	0	2	0	3	12	35	54
10	8	0	0	0	0	3	0	0	18	26
0	16	0	0	0	6	0	0	1	5	62
0	16	0	0	0	0	0	0	0	8	42
2	5	0	0	0	0	0	0	0	0	27
2	2	0	0	0	0	0	0	0	4	10
0	21	0	0	0	12	0	0	3	7	100
1	19	0	0	0	0	0	0	0	11	100
3	6	0	0	0	0	0	0	2	8	41
2	2	0	0	0	0	0	0	0	5	16
0	17	0	0	0	0	0	0	0	5	68
0	19	0	0	0	0	0	0	0	3	16
1	14	0	1	0	0	0	0	0	4	43
0	4	6	0	0	0	6	0	2	5	19
0	24	0	0	0	2	0	0	1	4	100
0	25	0	0	0	1	0	0	0	3	100
2	17	0	1	0	0	2	0	0	3	49
5	8	0	0	0	2	6	0	0	7	19
0	19	0	0	0	0	0	0	0	18	70
0	16	0	0	0	0	0	0	0	23	49
0	14	0	1	0	0	0	0	0	0	50
0	6	0	0	0	0	0	0	0	13	37
0	22	0	0	0	7	0	0	0	32	100
0	24	0	0	0	2	0	0	0	43	100
1	17	0	1	0	2	0	0	0	28	68
2	7	0	1	0	2	0	0	0	24	46

## Sheet: Sheet2
1.21	1.37	380	250	1.5
1.21	1.37	380	100	1.5
1.21	1.37	380	10	1.5
1.21	1.37	380	1	1.5
1.21	1.37	380	250	3
1.21	1.37	380	100	3
1.21	1.37	380	10	3
1.21	1.37	380	1	3
0.66	1.51	380	250	1.5
0.66	1.51	380	100	1.5
0.66	1.51	380	10	1.5
0.66	1.51	380	1	1.5
0.66	1.51	380	250	3
0.66	1.51	380	100	3
0.66	1.51	380	10	3
0.66	1.51	380	1	3
0.75	2.11	347	250	1.5
0.75	2.11	347	100	1.5
0.75	2.11	347	10	1.5
0.75	2.11	347	1	1.5
0.75	2.11	347	250	3
0.75	2.11	347	100	3
0.75	2.11	347	10	3
0.75	2.11	347	1	3
0.31	2.19	375	250	1.5
0.31	2.19	375	100	1.5
0.31	2.19	375	10	1.5
0.31	2.19	375	1	1.5
0.31	2.19	375	250	3
0.31	2.19	375	100	3
0.31	2.19	375	10	3
0.31	2.19	375	1	3
0.77	1.33	452	250	1.5
0.77	1.33	452	100	1.5
0.77	1.33	452	10	1.5
0.77	1.33	452	1	1.5
0.77	1.33	452	250	3
0.77	1.33	452	100	3
0.77	1.33	452	10	3
0.77	1.33	452	1	3
1.82	0.68	300	250	1.5
1.82	0.68	300	100	1.5
1.82	0.68	300	10	1.5
1.82	0.68	300	1	1.5
1.82	0.68	300	250	3
1.82	0.68	300	100	3
1.82	0.68	300	10	3
1.82	0.68	300	1	3
0.78	1.27	528	250	1.5
0.78	1.27	528	100	1.5
0.78	1.27	528	10	1.5
0.78	1.27	528	1	1.5
0.78	1.27	528	250	3
0.78	1.27	528	100	3
0.78	1.27	528	10	3
0.78	1.27	528	1	3
1.18	0.84	549	250	1.5
1.18	0.84	549	100	1.5
1.18	0.84	549	10	1.5
1.18	0.84	549	1	1.5
1.18	0.84	549	250	3
1.18	0.84	549	100	3
1.18	0.84	549	10	3
1.18	0.84	549	1	3
2.3	0.35	417	250	1.5
2.3	0.35	417	100	1.5
2.3	0.35	417	10	1.5
2.3	0.35	417	1	1.5
2.3	0.35	417	250	3
2.3	0.35	417	100	3
2.3	0.35	417	10	3
2.3	0.35	417	1	3
2.3	1.27	325	250	1.5
2.3	1.27	325	100	1.5
2.3	1.27	325	10	1.5
2.3	1.27	325	1	1.5
2.3	1.27	325	250	3
2.3	1.27	325	100	3
2.3	1.27	325	10	3
2.3	1.27	325	1	3
