# Supplementary material (part 2 of 2)
Source: ML conference proceedings conference paper supplement (https://openreview.net/forum?id=x7S1NsUdKZ)

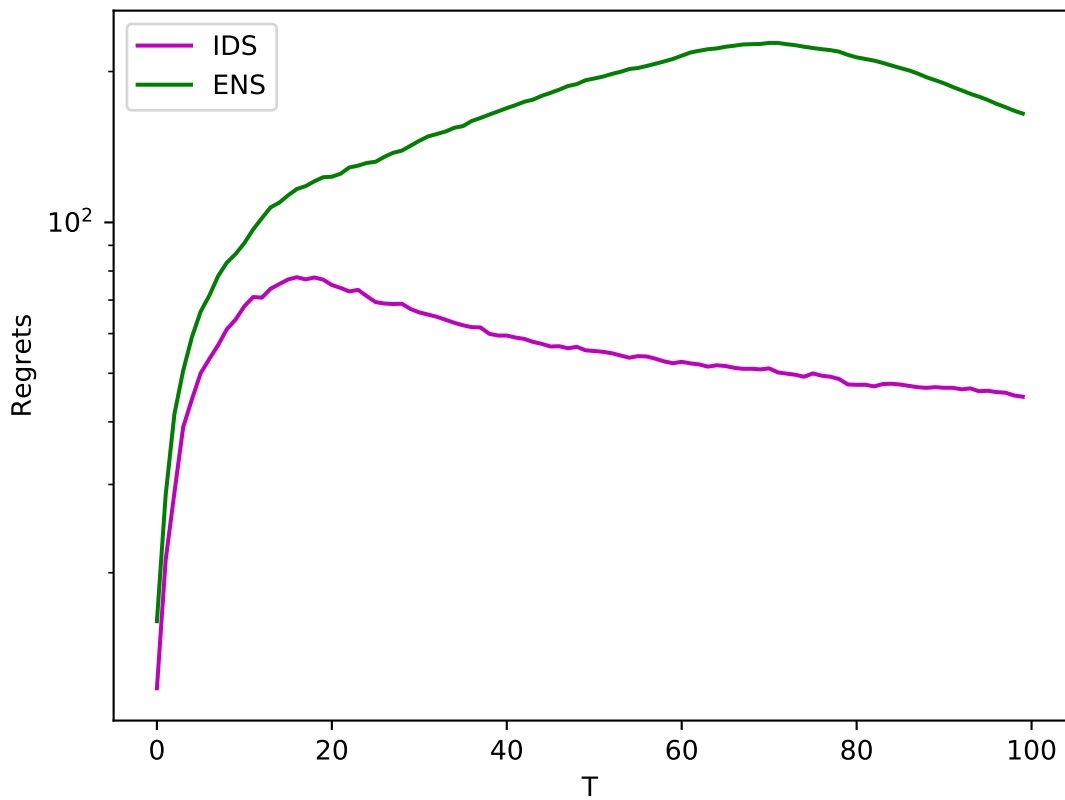

Supplement: supplementary_material [file attachment]

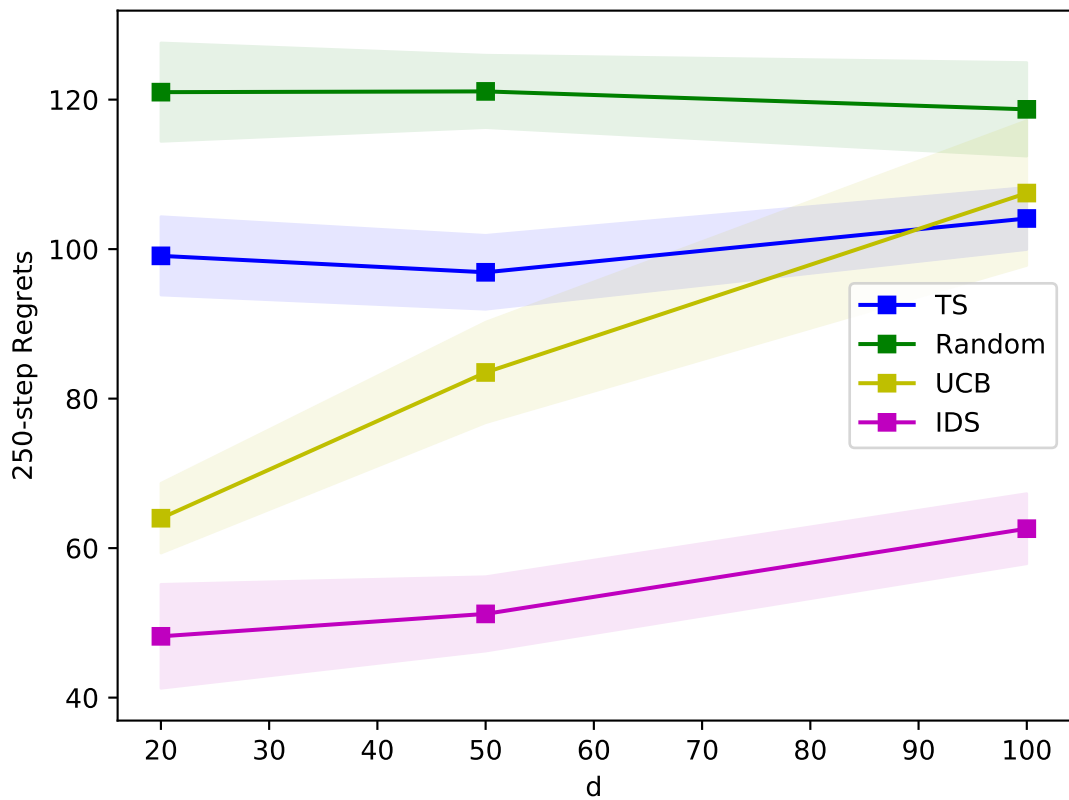

Supplement: supplementary_material [file attachment]

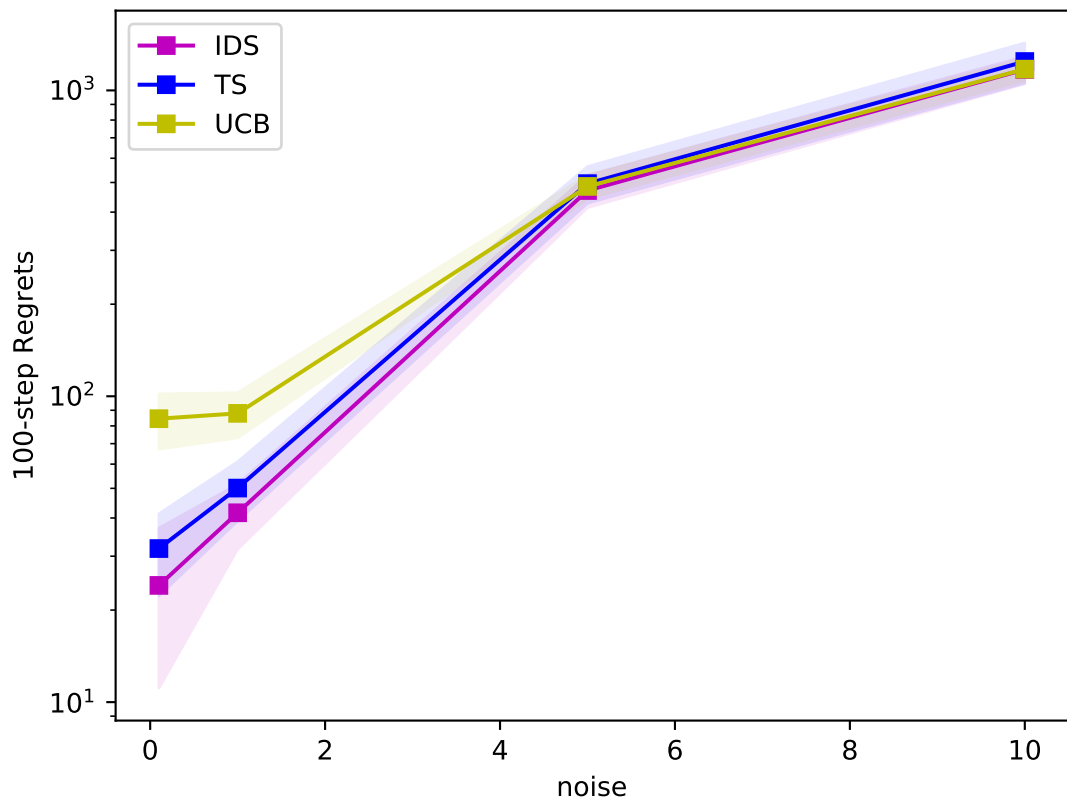

Supplement: supplementary_material [file attachment]
